# Supplementary material for: Real-time measurements of gas-phase organic acids using SF 6 − chemical ionization mass spectrometry
Source: Copernicus journal article supplement (doi:10.5194/amt-11-5087-2018), 2018-09-07
Supplement: Supplementary file 1 [file amt-11-5087-2018-supplement.pdf]

Supplement of Atmos. Meas. Tech., 11, 5087–5104, 2018  
<https://doi.org/10.5194/amt-11-5087-2018-supplement>  
© Author(s) 2018. This work is distributed under  
the Creative Commons Attribution 4.0 License.

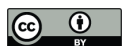

*Supplement of*

## **Real-time measurements of gas-phase organic acids using $\text{SF}_6^-$ chemical ionization mass spectrometry**

**Theodora Nah et al.**

*Correspondence to:* L. Gregory Huey ([greg.huey@eas.gatech.edu](mailto:greg.huey@eas.gatech.edu))

The copyright of individual parts of the supplement might differ from the CC BY 4.0 License.

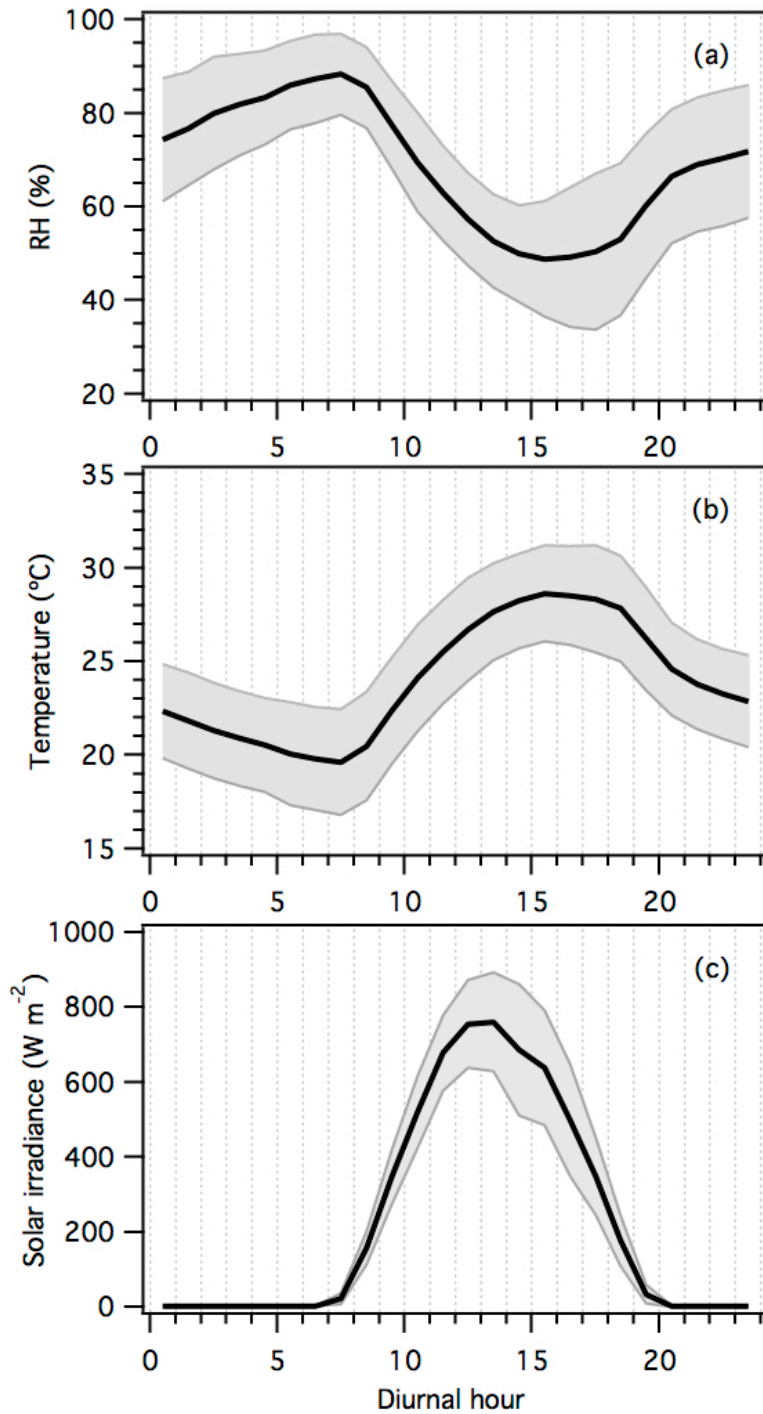

13

14 **Figure S1:** Diurnal trends of (a) relative humidity, (b) temperature, and (c) solar radiance.

15 The lines within the shaded area represents the average values. The upper and lower

16 boundaries of the shaded areas mark one standard deviation.

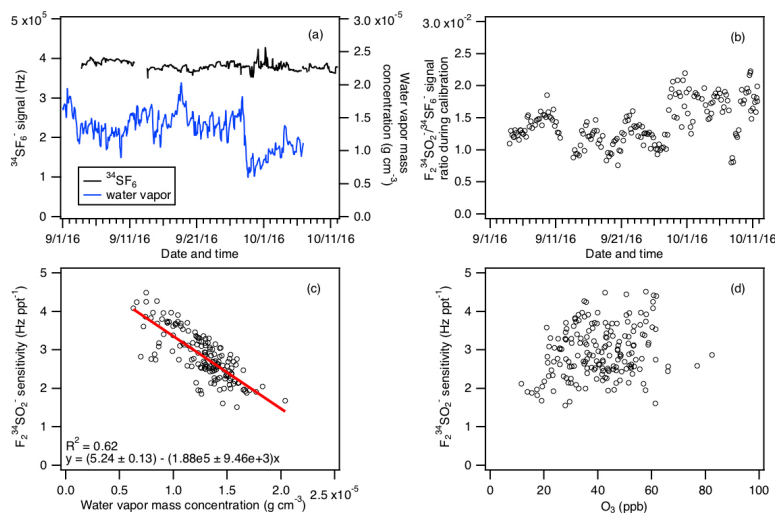

17

18 **Figure S2:** (a) Time series of <sup>34</sup>SF<sub>6</sub><sup>-</sup> reagent ion signal and ambient water vapor  
 19 concentration for the entire field study. The ambient water vapor mass concentrations are  
 20 determined from ambient relative humidities and temperatures. (b) Time series of F<sub>2</sub><sup>34</sup>SO<sub>2</sub><sup>-</sup>  
 21 /<sup>34</sup>SF<sub>6</sub><sup>-</sup> ion signal ratio obtained during calibration measurements. Panels (c) and (d) show  
 22 the F<sub>2</sub><sup>34</sup>SO<sub>2</sub><sup>-</sup> ion sensitivity obtained from calibration measurements as a function of  
 23 ambient water vapor and O<sub>3</sub> concentrations. Data in panels (a) to (d) are displayed as 1-  
 24 hour averages.

25

26

27

28

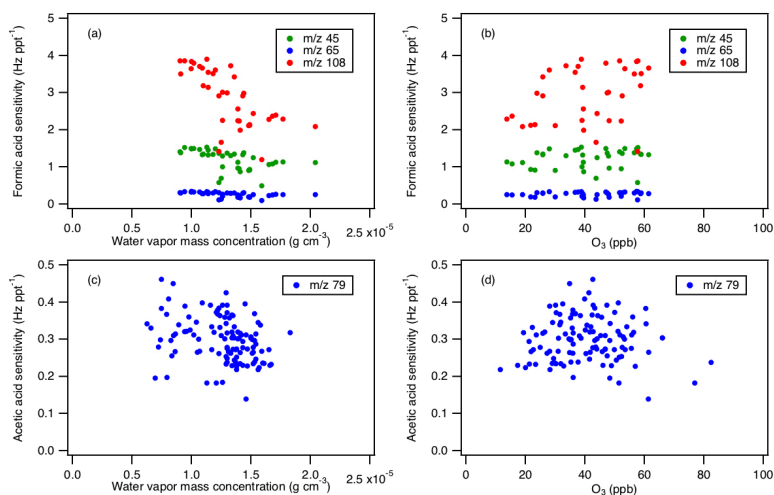

29

30 **Figure S3:** Panels (a) and (b) show the sensitivities of formic acid ions (HCOO<sup>-</sup> at m/z 45,  
 31 HCOO<sup>-</sup>•HF at m/z 65, and SF<sub>4</sub><sup>-</sup> at m/z 108) obtained from calibration measurements as a  
 32 function of ambient water vapor and O<sub>3</sub> concentrations. Panels (c) and (d) show the acetic  
 33 acid sensitivity (CH<sub>3</sub>COO<sup>-</sup>•HF at m/z 79) obtained from calibration measurements as a  
 34 function of ambient water vapor and O<sub>3</sub> concentrations.

35

36

37

38

39

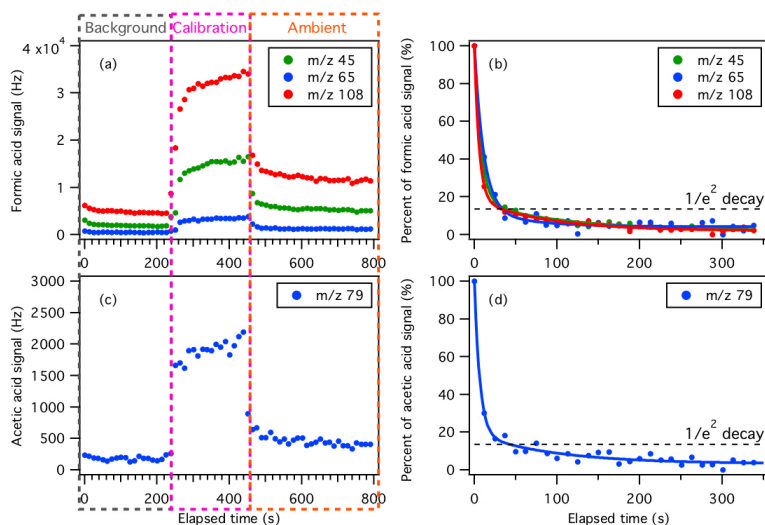

40

41 **Figure S4:** Example of the CIMS instrument response during switches between  
 42 background, calibration and ambient measurements of (a) formic, and (c) acetic acids.  
 43 Panels (b) and (d) show the percent of formic and acetic acid ion signals after the removal  
 44 of a 6.75 ppb of formic acid and 5.87 ppb of acetic acid standard addition calibration as a  
 45 function of time. The data shown here is 13 s time resolution data. Double exponential fits  
 46 to each m/z ion are shown as colored solid lines. Black dashed lines show the times for the  
 47 ions to decay to  $1/e^2$ .

48

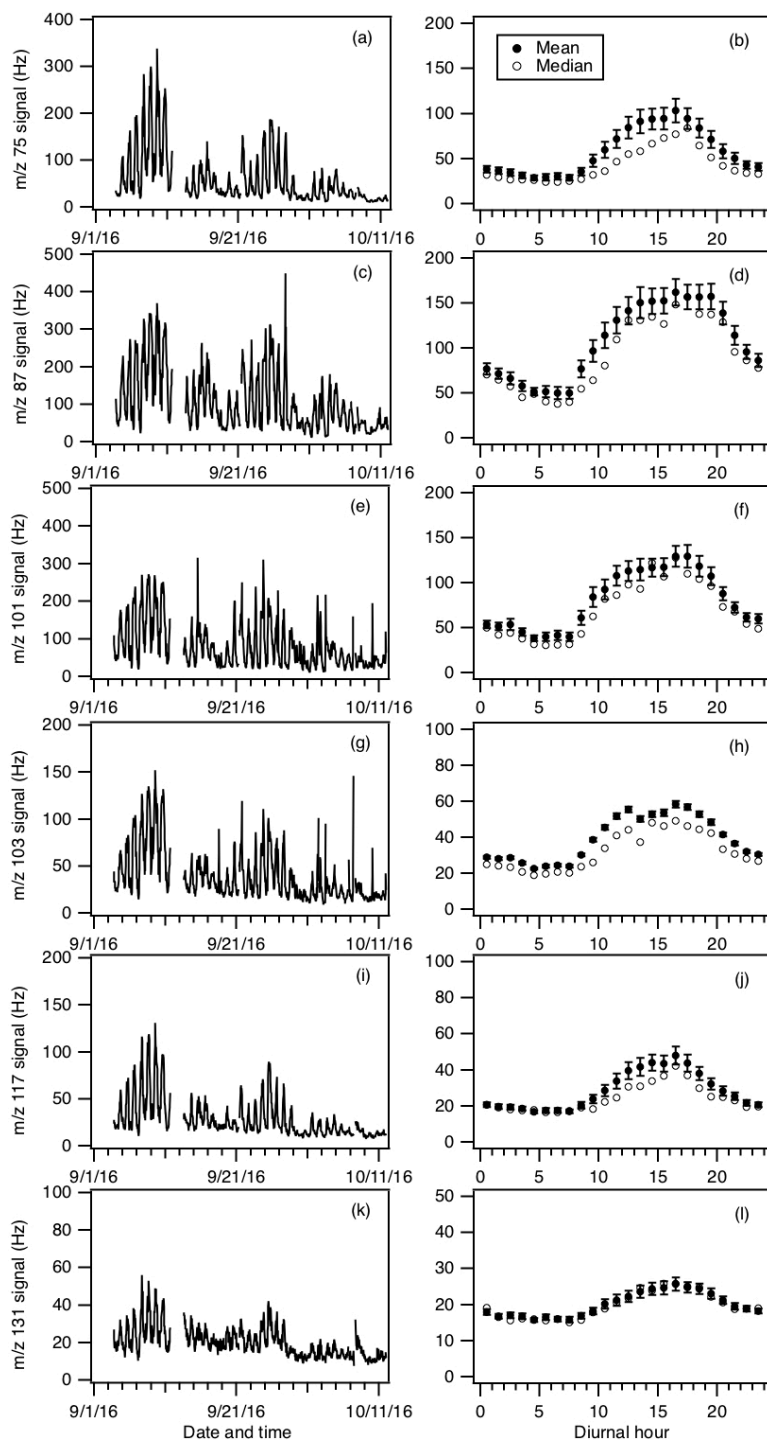

49

50 **Figure S5:** Time series and diurnal profiles of ion signals of organic acids with  $m/z$  75, 87,  
 51 101, 103, 117 and 131 measured during the field study. The data are displayed as 1-hour  
 52 averages. All the signals represent averages in 1-hour intervals and the standard errors are  
 53 plotted as error bars.

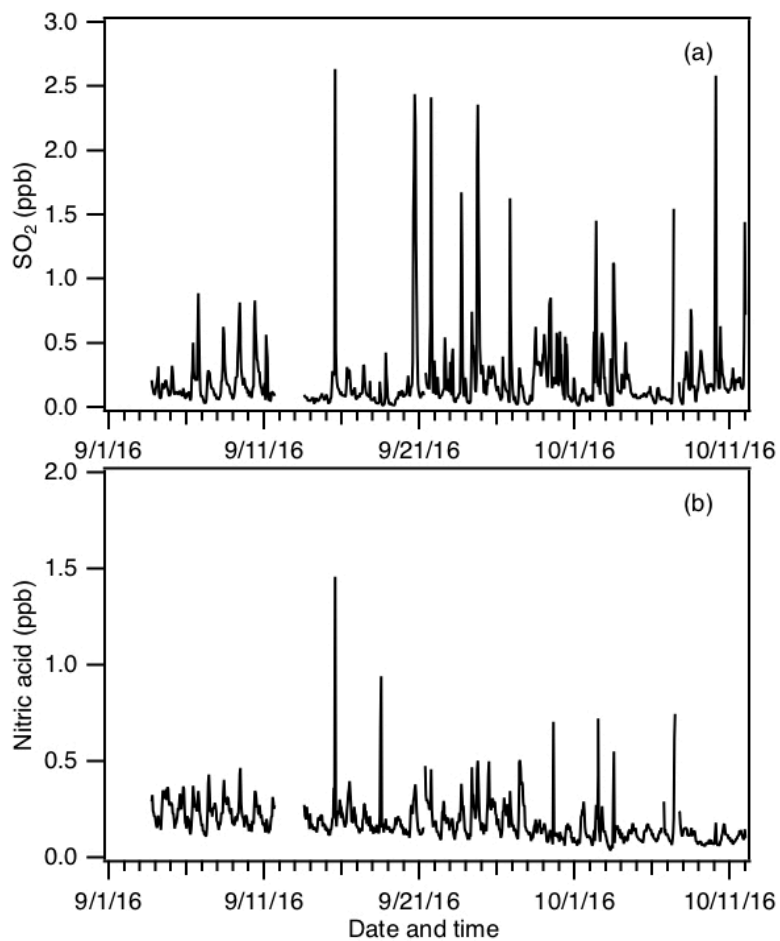

54

55 **Figure S6:** Time series of (a) SO<sub>2</sub> and (b) HNO<sub>3</sub> concentrations measured during the field  
56 study. All the data are displayed as 1-hour averages.

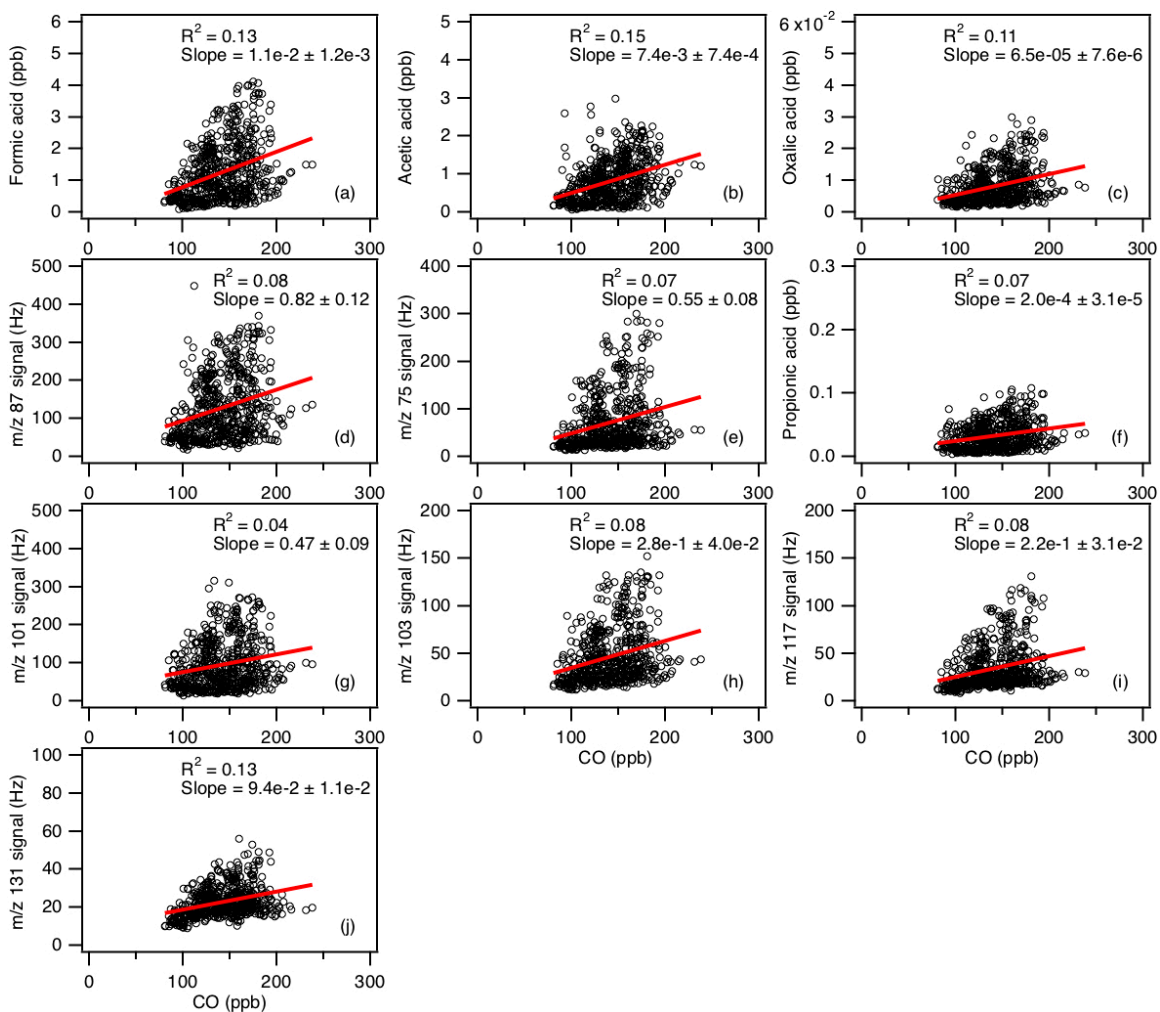

57

58 **Figure S7:** Scatter plots of concentrations (or ion signals) of the measured organic acids  
 59 with CO concentration. All the data are displayed as 1-hour averages. Red lines shown are  
 60 linear fits to the data.



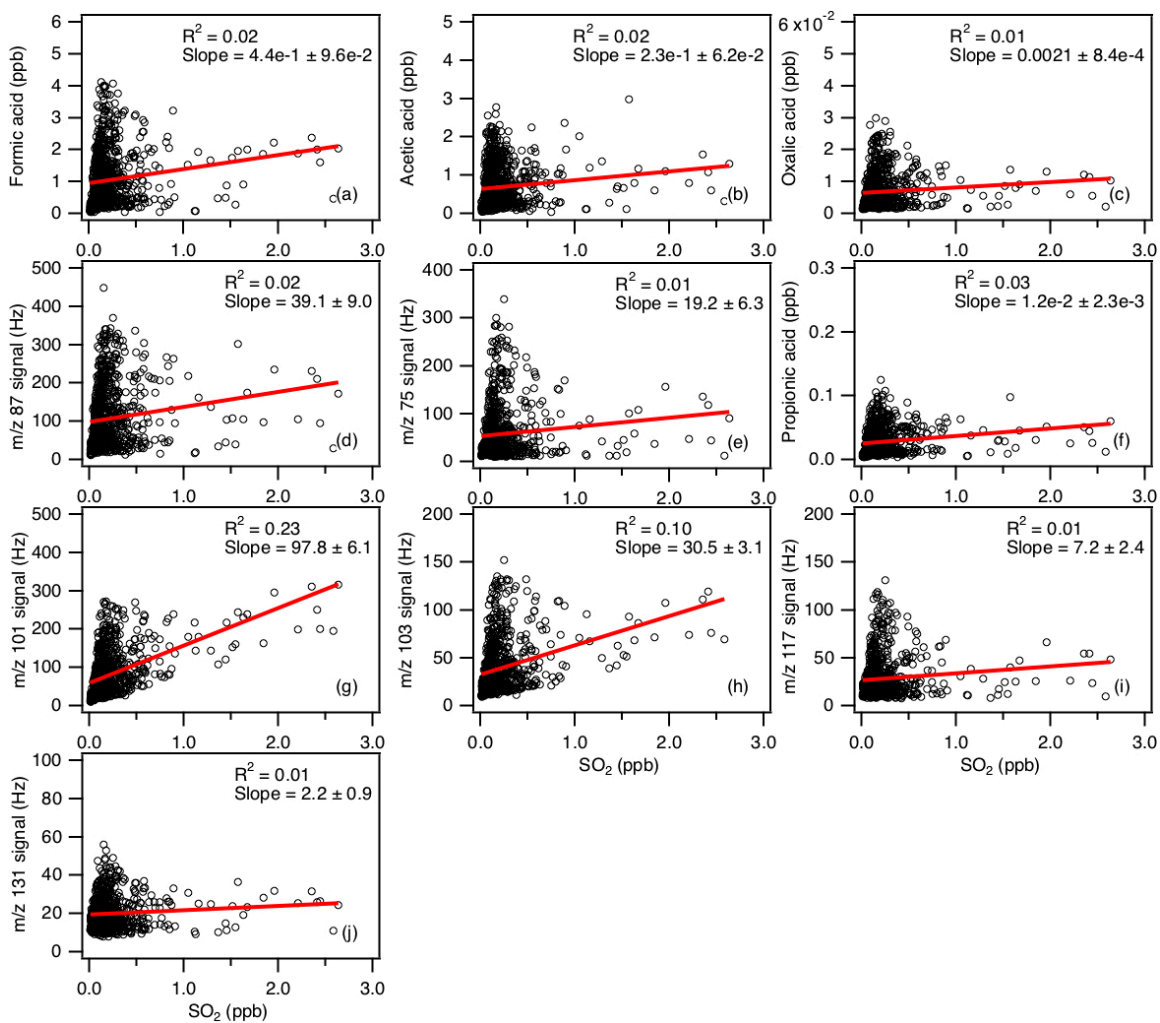

61

62 **Figure S8:** Scatter plots of concentrations (or ion signals) of the measured organic acids  
 63 with SO<sub>2</sub> concentration. All the data are displayed as 1-hour averages. Red lines shown are  
 64 linear fits to the data.

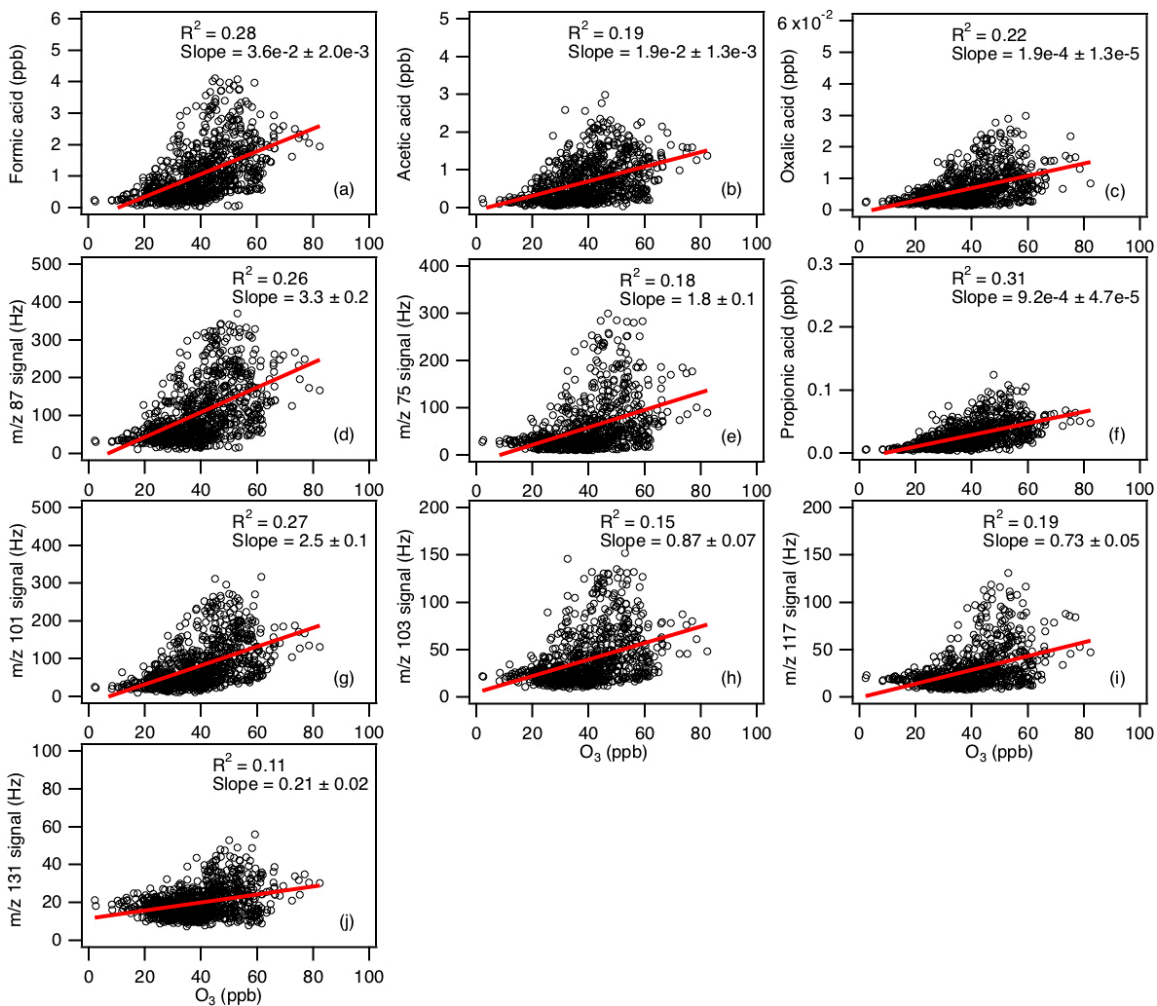

65

66 **Figure S9:** Scatter plots of concentrations (or ion signals) of the measured organic acids  
 67 with O<sub>3</sub> concentration. All the data are displayed as 1-hour averages. Red lines shown are  
 68 linear fits to the data.

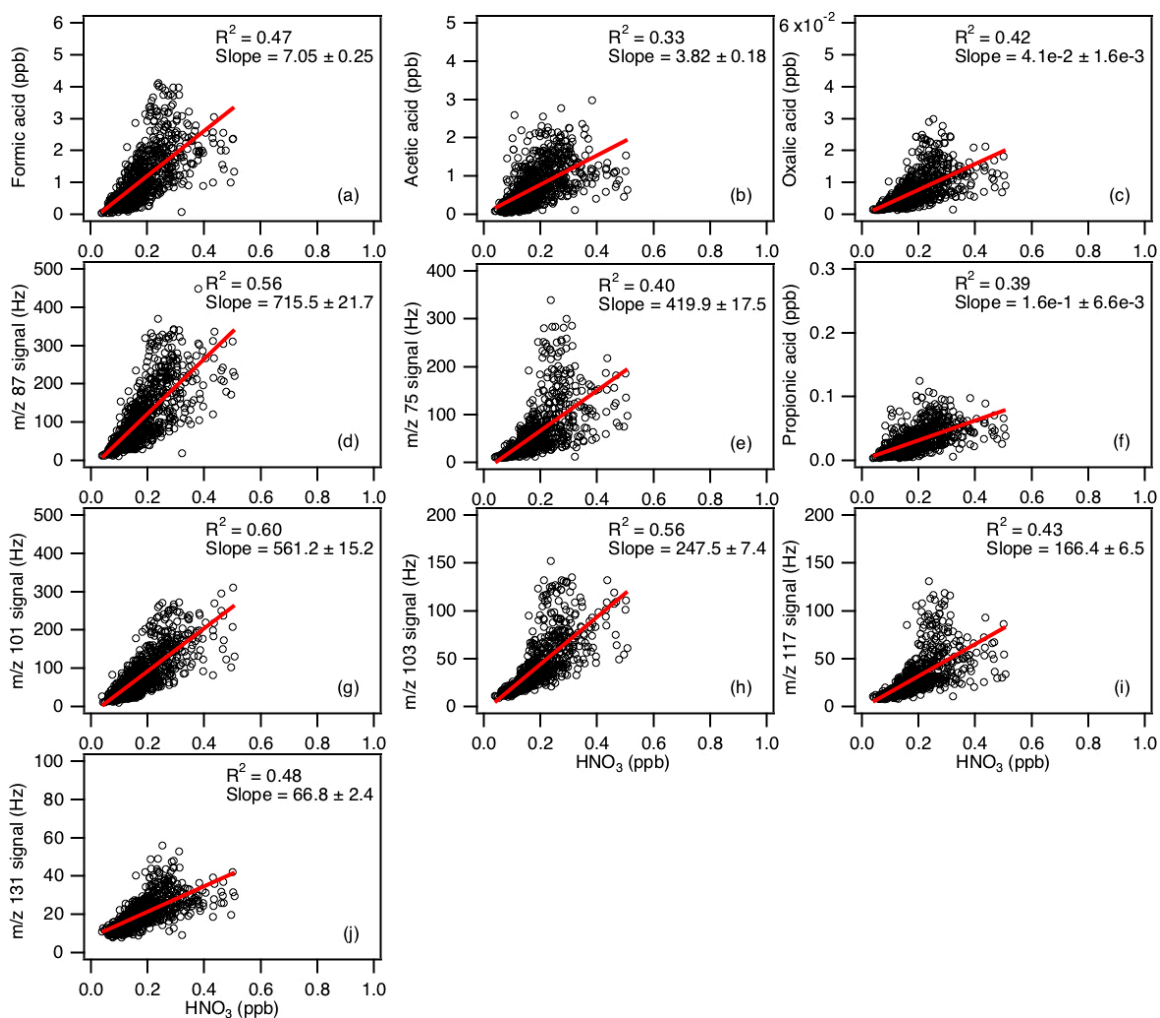

69

70 **Figure S10:** Scatter plots of concentrations (or ion signals) of the measured organic acids  
 71 with  $\text{HNO}_3$  concentration. To exclude periods when the site was affected by urban or power  
 72 plant emissions, data where  $\text{HNO}_3 > 0.5$  ppb are excluded from these scatter plots. All the  
 73 data are displayed as 1-hour averages. Red lines shown are linear fits to the data.

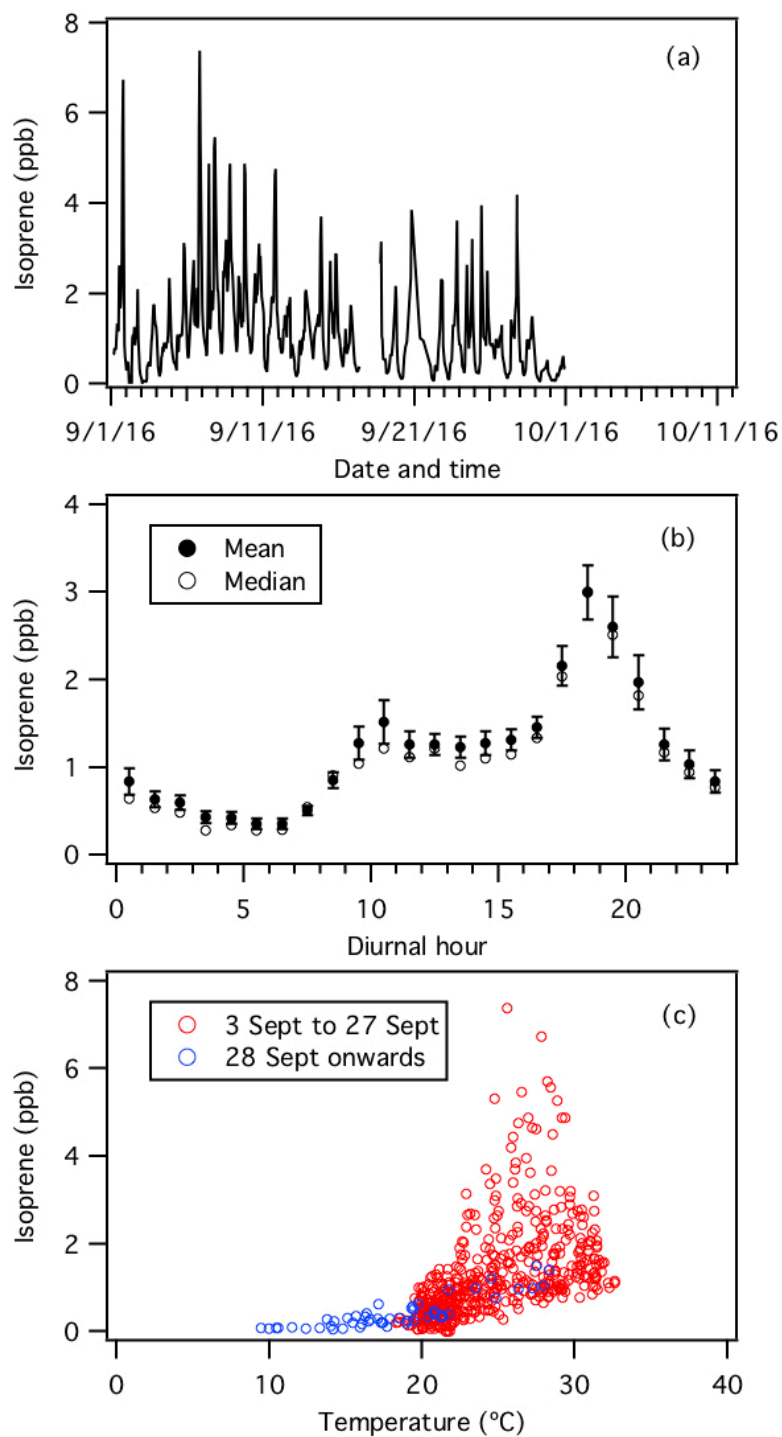

74

75 **Figure S11:** (a) Time series of isoprene concentration during the field study. (b) Diurnal  
 76 profile of isoprene. All the concentrations represent averages in 1-hour intervals and the  
 77 standard errors are plotted as error bars. (c) Scatter plot of isoprene concentration with  
 78 ambient temperature. All the data are displayed as 1-hour averages.

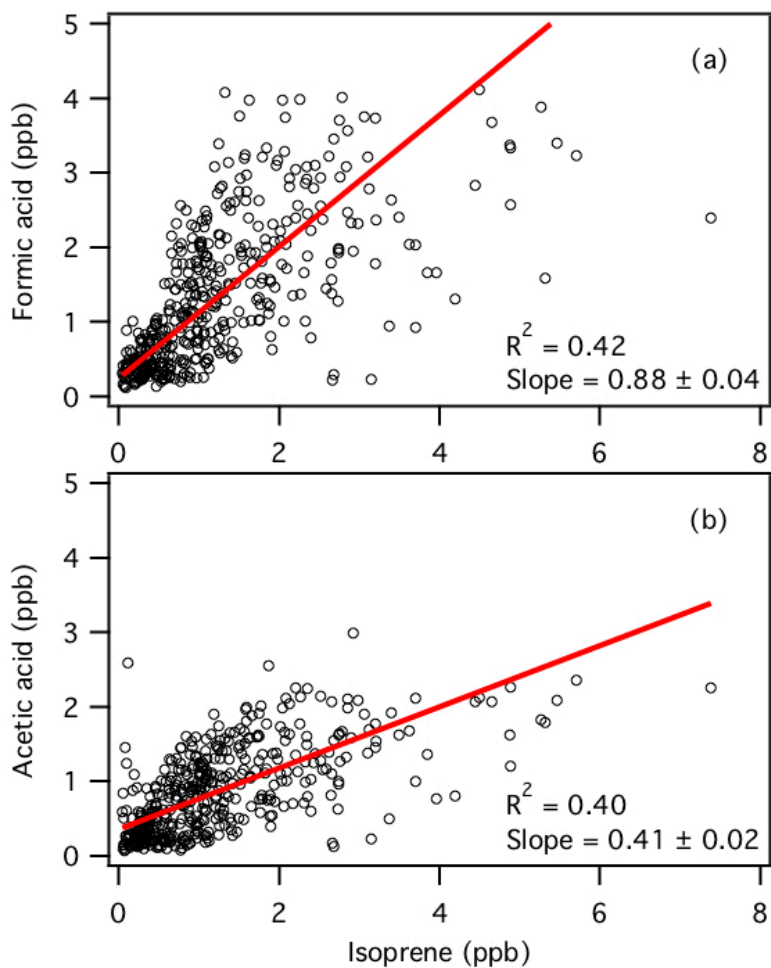

79

80 **Figure S12:** Scatter plots of concentrations of (a) formic and (b) acetic acids with isoprene  
81 concentration. All the data are displayed as 1-hour averages. Red lines shown are linear  
82 fits to the data.

83

84

85

86

87

88

89

90

91

92

93 Table S1a: Comparison of SF<sub>6</sub><sup>-</sup> vs. I<sup>-</sup> sensitivities of organic acids

| Organic Acid   | I <sup>-</sup> sensitivity<br>(Hz ppt <sup>-1</sup> ) <sup>a</sup> | SF <sub>6</sub> <sup>-</sup> sensitivity (Hz ppt <sup>-1</sup> ) |                    |
|----------------|--------------------------------------------------------------------|------------------------------------------------------------------|--------------------|
|                |                                                                    | X <sup>-</sup>                                                   | X <sup>-</sup> •HF |
| Formic acid    | 2.9                                                                | 1.29 ± 0.22                                                      | 0.29 ± 0.05        |
| Acetic acid    | 0.1                                                                | 1.46 ± 0.29                                                      | 0.30 ± 0.06        |
| Oxalic acid    | 0.21                                                               | 6.38 ± 0.32                                                      | 0.97 ± 0.05        |
| Butyric acid   | Not available                                                      | 0.41 ± 0.01                                                      | 0.12 ± 0.004       |
| Glycolic acid  | 1.1                                                                | 5.53 ± 0.11                                                      | 1.64 ± 0.03        |
| Propionic acid | 0.066                                                              | 2.05 ± 0.02                                                      | 1.26 ± 0.01        |
| Valeric acid   | Not available                                                      | 0.76 ± 0.008                                                     | 0.35 ± 0.004       |

94 <sup>a</sup>The I<sup>-</sup> sensitivities shown here are those reported by Lee et al. (2014). The organic acids  
 95 were detected as cluster ions with iodide (I(X)<sup>-</sup>).  
 96

97 Table S1b: Comparison of SF<sub>6</sub><sup>-</sup> vs. I<sup>-</sup> sensitivities of inorganic compounds

| Inorganic compound | I <sup>-</sup> sensitivity<br>(Hz ppt <sup>-1</sup> ) <sup>b</sup> | SF <sub>6</sub> <sup>-</sup> sensitivity<br>(Hz ppt <sup>-1</sup> )                             |
|--------------------|--------------------------------------------------------------------|-------------------------------------------------------------------------------------------------|
| SO <sub>2</sub>    | 0.028                                                              | 2.9                                                                                             |
| HNO <sub>3</sub>   | 9.0                                                                | 5.8 for NO <sub>3</sub> <sup>-</sup> ,<br>0.2 for NO <sub>3</sub> <sup>-</sup> •HF <sup>c</sup> |
| HCl                | 0.03                                                               | 1.4 <sup>d</sup>                                                                                |

98 <sup>b</sup>The I<sup>-</sup> sensitivities shown here are those reported by Lee et al. (2018).

99 <sup>c</sup>The high collision energy used in the CDC promoted the dissociation of NO<sub>3</sub><sup>-</sup>•HF ions,  
 100 causing the low sensitivity at NO<sub>3</sub><sup>-</sup>•HF.

101 <sup>d</sup>HCl was detected as SF<sub>5</sub>Cl<sup>-</sup>.  
 102

### 103 References

104 Lee, B. H., Lopez-Hilfiker, F. D., Mohr, C., Kurten, T., Worsnop, D. R., and Thornton, J.  
 105 A.: An Iodide-Adduct High-Resolution Time-of-Flight Chemical-Ionization Mass  
 106 Spectrometer: Application to Atmospheric Inorganic and Organic Compounds,  
 107 Environmental Science & Technology, 48, 6309-6317, 10.1021/es500362a, 2014.

108 Lee, B. H., Lopez-Hilfiker, F. D., Veres, P. R., McDuffie, E. E., Fibiger, D. L., Sparks, T.  
 109 L., Ebben, C. J., Green, J. R., Schroder, J. C., Campuzano-Jost, P., Iyer, S., D'Ambro, E.  
 110 L., Schobesberger, S., Brown, S. S., Wooldridge, P. J., Cohen, R. C., Fiddler, M. N.,  
 111 Bililign, S., Jimenez, J. L., Kurtén, T., Weinheimer, A. J., Jaegle, L., and Thornton, J. A.:  
 112 Flight Deployment of a High-Resolution Time-of-Flight Chemical Ionization Mass  
 113 Spectrometer: Observations of Reactive Halogen and Nitrogen Oxide Species, Journal of  
 114 Geophysical Research: Atmospheres, 0, doi:10.1029/2017JD028082, 2018.
